# Supplementary material
Source: MDPI journal article supplement (https://www.mdpi.com/2673-1592/4/4/47)
Supplement: s1 [file s1]

# Resin-Bonded Prosthesis in posterior area to prevent early marginal bone resorption in implants placed at tissue level

Carlo Prati<sup>1</sup>, Fausto Zamparini<sup>1</sup>, Arash Azizi<sup>1</sup>, Andrea Spinelli<sup>1</sup>, Maria Giovanna Gandolfi<sup>2</sup>

<sup>1</sup>Endodontic Clinical Section, School of Dentistry, Department of Biomedical and Neuromotor Sciences, (DIBINEM) University of Bologna, Bologna, Italy.

<sup>2</sup>Laboratory of Biomaterials and Oral Pathology, School of Dentistry, DIBINEM, University of Bologna, Bologna, Italy. \*

Correspondence: Prof. Carlo Prati (e-mail Carlo.prati@unibo.it)

| <b>Table S1</b>          |             | Generalized linear model with mixed effects of MBL-M and MBL-D at 12 months |                   |              |
|--------------------------|-------------|-----------------------------------------------------------------------------|-------------------|--------------|
| Parameters               | Coefficient | Robust SE                                                                   | 95% CI            | p-value      |
| <b>MBL-M</b>             |             |                                                                             |                   |              |
| Gender                   | 0.095       | 0.2314                                                                      | [-0.357; 0.549]   | 0.678        |
| Age                      | 0.106       | 0.1078                                                                      | [-0.104; 0.3177]  | 0.324        |
| Location                 | -0.1306     | 0.1221                                                                      | [-0.181; 0.224]   | 0.284        |
| Diameter                 | -0.030      | 0.1805                                                                      | [-0.384; 0.323]   | 0.866        |
| Implant Placement timing | 0.376       | 0.2570                                                                      | [-0.1276; 0.8798] | 0.143        |
| RBP                      | -0.604      | 0.1754                                                                      | [-1.062; -0.0391] | <b>0.035</b> |
| Teeth Endo Status        | 0.0214      | 0.1033                                                                      | [-0.181; 0.224]   | 0.836        |
| <b>MBL-D</b>             |             |                                                                             |                   |              |
| Gender                   | -0.140      | 0.2165                                                                      | [-0.565; 0.283]   | 0.516        |
| Age                      | 0.105       | 0.1019                                                                      | [-0.092; 0.303]   | 0.298        |
| Location                 | -0.1315     | 0.1142                                                                      | [-0.355; 0.0924]  | 0.250        |
| Diameter                 | -0.1338     | 0.1688                                                                      | [-0.464; 0.1971]  | 0.428        |
| Implant Placement timing | 0.3109      | 0.2424                                                                      | [-0.1641; 0.7860] | 0.200        |
| RBP                      | -0.553      | 0.2443                                                                      | [-1.032; -0.0749] | <b>0.023</b> |
| Teeth Endo Status        | 0.774       | 0.9688                                                                      | [-0.1123; 0.2673] | 0.424        |

| <b>Table S2</b>          | Generalized linear model with mixed effects of Area-M and Area-D at 12 months |           |                   |              |
|--------------------------|-------------------------------------------------------------------------------|-----------|-------------------|--------------|
| Parameters               | Coefficient                                                                   | Robust SE | 95% CI            | p-value      |
| <b>Area-M</b>            |                                                                               |           |                   |              |
| Gender                   | -0.015                                                                        | 0.1431    | [-0.2969; 0.2668] | 0.917        |
| Age                      | 0.1462                                                                        | 0.6725    | [0.1484; 0.2771]  | <b>0.029</b> |
| Location                 | -0.1202                                                                       | 0.0758    | [-0.2688; 0.0284] | 0.113        |
| Diameter                 | -0.0536                                                                       | 0.1121    | [-0.2733; 0.1664] | 0.633        |
| Implant Placement timing | 0.2336                                                                        | 0.1597    | [-0.0794; 0.5466] | 0.144        |
| RBP                      | -0.2526                                                                       | 0.1622    | [-0.948; -0.2601] | 0.119        |
| Teeth Endo Status        | 0.0083                                                                        | 0.0643    | [-0.1171; 0.1347] | 0.897        |
| <b>Area-D</b>            |                                                                               |           |                   |              |
| Gender                   | -0.146                                                                        | 0.148     | [-0.437;0.145]    | 0.325        |
| Age                      | 0.1271                                                                        | 0.0793    | [-0.0283; 0.2828] | 0.109        |
| Location                 | -0.0322                                                                       | 0.1703    | [-0.3662; 0.3013] | 0.849        |
| Diameter                 | -0.1398                                                                       | 0.1327    | [-0.4002; 0.1202] | 0.292        |
| Implant Placement timing | 0.2650                                                                        | 0.1896    | [-0.1066; 0.6368] | 0.162        |
| RBP                      | -0.4923                                                                       | 0.1920    | [-0.4002; 0.1202] | <b>0.010</b> |
| Teeth Endo Status        | -0.0142                                                                       | 0.0761    | [-0.1635; 0.1349] | 0.851        |

| <b>Table S3</b>          | Generalized linear model with mixed effects of CEJ-M and CEJ-D at 12 months |           |                   |         |
|--------------------------|-----------------------------------------------------------------------------|-----------|-------------------|---------|
| Parameters               | Coefficient                                                                 | Robust SE | 95% CI            | p-value |
| <b>CEJ-M</b>             |                                                                             |           |                   |         |
| Gender                   | -0.0301                                                                     | 0.1832    | [-0.3893; 0.3289] | 0.869   |
| Age                      | -0.1201                                                                     | 0.0853    | [-0.2875; 0.0471] | 0.159   |
| Location                 | 0.1560                                                                      | 0.0966    | [-0.0333; 0.3454] | 0.106   |
| Diameter                 | -0.3103                                                                     | 0.1428    | [-0.5903; -0.030] | 0.060   |
| Implant Placement timing | 0.0908                                                                      | 0.2097    | [-0.3203; 0.5019] | 0.665   |
| RBP                      | -0.17823                                                                    | 0.2066    | [-0.5832; 0.2268] | 0.388   |
| Teeth Endo Status        | -0.1512                                                                     | 0.0819    | [-0.311; 0.009]   | 0.065   |
| <b>CEJ-D</b>             |                                                                             |           |                   |         |
| Gender                   | -0.0877                                                                     | 0.1634    | [-0.4081; 0.2325] | 0.591   |
| Age                      | -0.1136                                                                     | 0.0761    | [-0.2629; 0.0355] | 0.136   |
| Location                 | 0.0248                                                                      | 0.0861    | [-0.1440; 0.1938] | 0.773   |
| Diameter                 | 0.04628                                                                     | 0.1274    | [-0.2034; 0.2959] | 0.717   |
| Implant Placement timing | -0.0860                                                                     | 0.1870    | [-0.4526; 0.2805] | 0.646   |
| RBP                      | 0.1792                                                                      | 0.1843    | [-0.182; 0.5404]  | 0.331   |
| Teeth Endo Status        | 0.0732                                                                      | 0.0730    | [-0.069; 0.2165]  | 0.316   |
